# Supplementary material for: Tumor Transcriptome in Patients with Lower Pectoralis Muscle Area Reveals IL-8 as a Prognostic Biomarker in Non-Small Cell Lung Cancer
Source: Preprints.org preprint supplement (doi:10.20944/preprints201907.0046.v1), 2019-07-03
Supplement: Supplementary file 1 [file supplementary]

**Supplementary Table 2** Potentially secreted proteins identified in secretome-related databases based on the over-expressed genes in NSCLC patients with low muscularity.

| ***mRNA*** | ***CBS Server*** | ***Lung Cancer Secretome*** | ***Lung Cancer Vesiclepedia*** | ***Plasma***  ***Proteome*** | ***Total*** |
| --- | --- | --- | --- | --- | --- |
| IL8 | + | + | + | + | 4 |
| APOD | + | + | + | + | 4 |
| CADM1 | + | + | + | + | 4 |
| NPTX1 | + | + | + | + | 4 |
| CNTN1 | + | + | + | + | 4 |
| SCG2 | + | + | + | + | 4 |
| NCAM1 | + | + | + | + | 4 |
| BMP2 | + | - | + | + | 3 |
| BMP6 | + | - | + | + | 3 |
| ITIH5 | + | - | + | + | 3 |
| LPL | + | - | + | + | 3 |
| MMP19 | + | - | + | + | 3 |
| FAM177A1 | + | - | + | + | 3 |
| AKAP12 | - | + | + | + | 3 |
| BCAT1 | - | + | + | + | 3 |
| COL14A1 | - | + | + | + | 3 |
| HBB | - | + | + | + | 3 |
| IL1R2 | + | + | - | + | 3 |
| IL6 | + | + | - | + | 3 |
| LYVE1 | + | + | - | + | 3 |
| PENK | + | + | - | + | 3 |
| BMPER | + | - | - | + | 2 |
| CCL8 | + | - | - | + | 2 |
| CSF3 | + | - | - | + | 2 |
| FCGR3B | + | - | - | + | 2 |
| FLRT2 | + | - | - | + | 2 |
| SELE | + | - | - | + | 2 |
| FOSB | + | - | - | + | 2 |
| NR4A1 | + | - | - | + | 2 |
| IL13RA2 | + | - | + | - | 2 |
| NPNT | + | - | + | - | 2 |
| PRR15 | + | - | + | - | 2 |
| CEMIP | + | + | - | - | 2 |
| ATP1B1 | - | + | + | - | 2 |
| ADAMTS4 | - | - | + | + | 2 |
| KIF1A | - | + | - | + | 2 |
| MAP2 | - | + | - | + | 2 |
| PCSK2 | - | + | - | + | 2 |
| RSPO3 | + | - | - | + | 2 |
| CD300E | + | - | - | - | 1 |
| COL6A6 | + | - | - | - | 1 |
| FGL1 | + | - | - | - | 1 |
| PCSK2 | + | - | - | - | 1 |
| CLEC4E | + | - | - | - | 1 |
| LINC01554 | + | - | - | - | 1 |
| UBE2QL1 | + | - | - | - | 1 |
| PLA2G3 | - | + | - | - | 1 |
| NPY1R | - | - | + | - | 1 |
| RDH10 | - | - | + | - | 1 |
| FGL1 | - | - | - | + | 1 |
| FOS | - | - | - | + | 1 |
| HAL | - | - | - | + | 1 |
| INSM1 | - | - | - | + | 1 |
| KCNK3 | - | - | - | + | 1 |
| MAP2K6 | - | - | - | + | 1 |
| NR4A3 | - | - | - | + | 1 |
| PCK1 | - | - | - | + | 1 |
| PDE4B | - | - | - | + | 1 |
| PGM5 | - | - | - | + | 1 |
| PRKAA2 | - | - | - | + | 1 |
| RGS2 | - | - | - | + | 1 |
| TCHH | - | - | - | + | 1 |
| VPS37A | - | - | - | + | 1 |

(+): indicates the presence of the protein in the database; (-): indicates the absence of the protein in the database. CBS users: TargetP 1.1 [1], SignalP 4.0 [2], SecretomeP 2.0 [3]; Lung Cancer Secretome: Human Cancer Secretome Database [4]; Vesiclepedia [5]; Plasma Proteome database [6].

**References**

1. Emanuelsson O, Nielsen H, Brunak S, von Heijne G. Predicting subcellular localization of proteins based on their N-terminal amino acid sequence. *J Mol Biol* 2000;**300**:1005–1016.

2. Petersen T, Brunak S, von Heijne G, Nielsen H. SignalP 4.0: discriminating signal peptides from transmembrane regions. *Nat Methods* 2011;**29**:785–786.

3. Bendtsen J, Jensen L, Blom N, Von Heijne G, Brunak S. Feature-based prediction of non-classical and leaderless protein secretion. *Protein Eng Des Sel* 2004;**17**:349–356.

4. Feizi A, Banaei-esfahani A, Nielsen J. Database tool HCSD : the human cancer secretome database. *Database (Oxford)* 2015;bav051.

5. Kalra H, Simpson R, Ji H, Aikawa E, Altevogt P, Askenase P. Vesiclepedia: a compendium for extracellular vesicles with continuous community annotation. *PLoS Biol* 2012;**10**:e1001450.

6. Nanjappa V, Thomas J, Marimuthu A, Muthusamy B. Plasma Proteome Database as a resource for proteomics research: 2014 update. *Nucleic Acids Res* 2014;**42**:959–965.
