# Supplementary material for: Tumor Transcriptome in Patients with Lower Pectoralis Muscle Area Reveals IL-8 as a Prognostic Biomarker in Non-Small Cell Lung Cancer
Source: Preprints.org preprint supplement (doi:10.20944/preprints201907.0046.v1), 2019-07-03
Supplement: Supplementary file 2 [file Supporting table 1.docx]

**Supplementary Table 1** mRNA differentially expressed in tumors of 30 NSCLC patients with low muscularity compared with the gene expression of 59 NSCLC patients with high muscularity.

The transcriptomic data from “NSCLC-Radiomics-Genomics” TCIA collection were accessed using GEO (GSE58661). RefSeq: NCBI reference sequence; TCIA: The Cancer Imaging Archive; GEO: Gene Expression Omnibus.
